# Supplementary material for: Rationale and Design of a Genetic Study on Cardiometabolic Risk Factors: Protocol for the Tehran Cardiometabolic Genetic Study (TCGS)
Source: PubMed Central journal article supplement (PMC5344981; doi:10.2196/resprot.6050), 2017-02-23
Supplement: resprot_v6i2e28_app2.pdf [file resprot_v6i2e28_app2.pdf]

**Multimedia Appendix 1: Table 1. Demographic and laboratory information for child and young TCGS participants**

| Descriptive                           | < 10 yrs.  |           |            |            |            | 10-18 yrs.  |             |             |             |            | 19-30 yrs.  |             |              |             |             |
|---------------------------------------|------------|-----------|------------|------------|------------|-------------|-------------|-------------|-------------|------------|-------------|-------------|--------------|-------------|-------------|
|                                       | Baseline   | 2002-2005 | 2006-2008  | 2009-2011  | 2012-2014  | Baseline    | 2002-2005   | 2006-2008   | 2009-2011   | 2012-2014  | Baseline    | 2002-2005   | 2006-2008    | 2009-2011   | 2012-2014   |
| <b>Number</b>                         | 1121       | 960       | 841        | 623        | 426        | 2548        | 1676        | 1442        | 1141        | 944        | 2366        | 2417        | 2580         | 2775        | 2268        |
| <b>Follow-up time (Median)</b>        | 0          | 4         | 7          | 6          | 6          | 0           | 7           | 10          | 10          | 13         | 0           | 7           | 10           | 10          | 13          |
| <b>Age (Years)</b>                    | 6.4 (1.9)  | 6.9 (2.2) | 7.1 (2.1)  | 7.4 (2.2)  | 7.3 (2.1)  | 14.1 (2.5)  | 14.8 (2.2)  | 14.8 (2.3)  | 14.6 (2.2)  | 14.6 (2.3) | 24.3 (3.6)  | 24.1 (3.5)  | 24.3 (3.3)   | 24.9 (3.3)  | 25.3 (3.4)  |
| <b>Never smokers</b>                  | 1121       | -         | -          | -          | -          | 1134        | -           | -           | -           | -          | 2133        | 2092        | 2296         | 2429        | 1916        |
| <b>Marital status n (%)</b>           |            |           |            |            |            |             |             |             |             |            |             |             |              |             |             |
| <b>Single/never married</b>           | 1121 (100) | 960 (100) | 841 (100)  | 623.0      | 425 (99.8) | 2529 (99.3) | 1660 (99)   | 1437 (99.6) | 1134 (99.4) | 937 (99.3) | 1253 (53)   | 1367 (56.6) | 1523 (59)    | 1672 (60.3) | 1409 (62.1) |
| <b>Married</b>                        | -          | -         | -          | -          | 1 (99.8)   | 19 (0.7)    | 15 (0.9)    | 5 (0.4)     | 4 (0.4)     | 6 (0.6)    | 1102 (46.6) | 1039 (43)   | 1099 (42.6)  | 1074 (38.7) | 836 (36.9)  |
| <b>Divorced</b>                       | -          | -         | -          | -          | -          | -           | -           | -           | -           | -          | 11 (0.5)    | 9 (0.4)     | 12 (0.5)     | 23 (0.8)    | 20 (0.9)    |
| <b>Widowed</b>                        | -          | -         | -          | -          | -          | -           | -           | -           | -           | -          | -           | 1 (0)       | 1 (0)        | 2 (0.1)     | -           |
| <b>Education and work n (%)</b>       |            |           |            |            |            |             |             |             |             |            |             |             |              |             |             |
| <b>Literate</b>                       | 593 (52.9) | 547 (57)  | 516 (61.4) | 425 (68.2) | 283 (66.4) | 2541 (99.7) | 1674 (99.9) | 1416 (98.2) | 1140 (99.9) | 943 (99.9) | 2361 (99.8) | 2413 (99.8) | 2592 (100.5) | 2769 (99.8) | 2266 (99.9) |
| <b>Employed</b>                       | 2 (0.2)    | -         | -          | -          | -          | 1148 (45.1) | 82 (4.9)    | 63 (4.5)    | 17 (1.5)    | 9 (1)      | 1377 (58.2) | 926 (38.3)  | 927 (35.9)   | 784 (28.3)  | 527 (23.2)  |
| <b>Anthropometrics mean (SD)</b>      |            |           |            |            |            |             |             |             |             |            |             |             |              |             |             |
| <b>Height (cm)</b>                    | 116 (12)   | 121 (15)  | 123 (14)   | 124 (14)   | 125 (14)   | 156 (13)    | 160 (11)    | 161 (11)    | 161 (11)    | 161 (11)   | 165 (9)     | 166 (10)    | 166 (10)     | 166 (10)    | 168 (10)    |
| <b>Weight (kg)</b>                    | 21 (7)     | 25 (10)   | 26 (12)    | 27 (11)    | 28 (11)    | 50 (15)     | 55 (15)     | 57 (16)     | 58 (16)     | 58 (17)    | 66 (14)     | 67 (15)     | 68 (16)      | 70 (16)     | 71 (17)     |
| <b>BMI, kg/m<sup>2</sup></b>          | 16 (3)     | 16 (3)    | 17 (6)     | 17 (6)     | 17 (5)     | 20 (4)      | 21 (4)      | 22 (5)      | 22 (5)      | 22 (5)     | 24 (4)      | 25 (5)      | 24 (5)       | 25 (5)      | 25 (5)      |
| <b>Waist circumference (cm)</b>       | 54 (6)     | 58 (9)    | 58 (10)    | 60 (10)    | 60 (11)    | 69 (11)     | 74 (11)     | 74 (12)     | 78 (12)     | 77 (13)    | 79 (11)     | 82 (12)     | 81 (13)      | 86 (12)     | 86 (13)     |
| <b>Hip circumference (cm)</b>         | 63 (7)     | 67 (10)   | 67 (10)    | 68 (9)     | 68 (10)    | 86 (12)     | 90 (10)     | 91 (10)     | 91 (11)     | 90 (11)    | 98 (9)      | 98 (9)      | 98 (8)       | 98 (9)      | 98 (9)      |
| <b>Wrist circumference (cm)</b>       | 12.5 (1)   | 13 (1.3)  | 13 (1.4)   | 13.2 (1.3) | 12.9 (1.4) | 15.3 (1.4)  | 15.7 (1.4)  | 15.6 (1.5)  | 15.7 (1.4)  | 15.3 (1.4) | 16.1 (1.3)  | 16.2 (1.5)  | 15.9 (1.5)   | 16.1 (1.7)  | 15.7 (1.6)  |
| <b>Systolic blood pressure (mmHg)</b> | 102 (12)   | 92 (11)   | 93 (12)    | 96 (13)    | 95 (13)    | 105 (12)    | 102 (12)    | 101 (12)    | 102 (12)    | 103 (12)   | 110 (11)    | 107 (12)    | 105 (12)     | 107 (13)    | 107 (12)    |
| <b>Diastolic blood pressure</b>       | 70 (10)    | 62 (9)    | 61 (9)     | 61 (12)    | 62 (12)    | 71 (9)      | 68 (9)      | 66 (9)      | 68 (10)     | 69 (10)    | 73 (9)      | 70 (9)      | 69 (9)       | 72 (9)      | 72 (9)      |
| <b>Laboratory Values mean (SD)</b>    |            |           |            |            |            |             |             |             |             |            |             |             |              |             |             |
| <b>Fasting glucose (mg/dl)</b>        | 84 (9)     | 86 (8)    | 85 (8)     | 90 (7)     | 91 (8)     | 89 (8)      | 88 (11)     | 87 (8)      | 93 (7)      | 93 (7)     | 86 (10)     | 86 (10)     | 85 (9)       | 89 (14)     | 90 (11)     |
| <b>Total cholesterol (mg/dl)</b>      | 171 (30)   | 163 (28)  | 161 (28)   | 164 (30)   | 164 (27)   | 168 (32)    | 155 (29)    | 154 (30)    | 153 (28)    | 157 (29)   | 180 (37)    | 166 (34)    | 165 (33)     | 166 (33)    | 172 (35)    |
| <b>LDL_C (mg/dl)</b>                  | 107 (27)   | 101 (26)  | 97 (25)    | 94 (26)    | 92 (25)    | 103 (29)    | 94 (25)     | 90 (26)     | 85 (24)     | 86 (25)    | 112 (32)    | 103 (29)    | 100 (28)     | 96 (29)     | 100 (31)    |
| <b>HDL_C I (mg/dl)</b>                | 46 (11)    | 45 (11)   | 47 (12)    | 54 (12)    | 56 (12)    | 43 (10)     | 40 (10)     | 43 (10)     | 50 (11)     | 51 (12)    | 43 (11)     | 40 (10)     | 43 (10)      | 49 (11)     | 50 (12)     |
| <b>Non HDL cholesterol (mg/dl)</b>    | 125 (29)   | 119 (28)  | 114 (27)   | 110 (29)   | 109 (28)   | 125 (33)    | 115 (29)    | 110 (29)    | 104 (28)    | 106 (29)   | 136 (38)    | 125 (34)    | 122 (34)     | 117 (34)    | 122 (36)    |
| <b>Triglycerides (mg/dl)</b>          | 90 (38)    | 88 (39)   | 85 (38)    | 81 (40)    | 82 (40)    | 110 (59)    | 104 (53)    | 102 (55)    | 95 (49)     | 101 (53)   | 123 (87)    | 113 (70)    | 111 (72)     | 106 (92)    | 112 (72)    |
| <b>Using drug (%)</b>                 |            |           |            |            |            |             |             |             |             |            |             |             |              |             |             |
| <b>Lipid hypertension</b>             | -          | -         | -          | 2 (0.3)    | 1 (0.2)    | -           | 1 (0.1)     | 7 (0.5)     | 3 (0.3)     | 3 (0.3)    | 4 (0.2)     | 7 (0.3)     | 16 (0.6)     | 7 (0.3)     | 7 (0.3)     |
| <b>Diabetes</b>                       | -          | -         | -          | -          | -          | 1 (0)       | 1 (0.1)     | -           | -           | 2 (0.2)    | 5 (0.2)     | 5 (71.4)    | 5 (0.2)      | 8 (0.3)     | 9 (0.4)     |
|                                       | -          | -         | -          | -          | 1 (0.2)    | 2 (0.1)     | 2 (0.1)     | 1 (0.1)     | 2 (0.2)     | 1 (0.1)    | 3 (0.1)     | 8 (0.3)     | 9 (0.3)      | 24 (0.9)    | 22 (1)      |
