# Supplementary material for: Rationale and Design of a Genetic Study on Cardiometabolic Risk Factors: Protocol for the Tehran Cardiometabolic Genetic Study (TCGS)
Source: PubMed Central journal article supplement (PMC5344981; doi:10.2196/resprot.6050), 2017-02-23
Supplement: resprot_v6i2e28_app3.pdf [file resprot_v6i2e28_app3.pdf]

Multimedia Appendix 2: Table 2. Demographic and laboratory information for adult elderly among TCGS

| Descriptive                           | 31-50 yrs.  |             |             |             |             | 51-70 yrs. |             |             |             |             | More than 71 yrs. |            |            |            |            |
|---------------------------------------|-------------|-------------|-------------|-------------|-------------|------------|-------------|-------------|-------------|-------------|-------------------|------------|------------|------------|------------|
|                                       | Baseline    | 2002-2005   | 2006-2008   | 2009-2011   | 2012-2014   | Baseline   | 2002-2005   | 2006-2008   | 2009-2011   | 2012-2014   | Baseline          | 2002-2005  | 2006-2008  | 2009-2011  | 2012-2014  |
| <b>Number</b>                         | 3812        | 3803        | 4048        | 4327        | 4332        | 2245       | 2443        | 2684        | 2981        | 3102        | 266               | 423        | 587        | 890        | 1044       |
| <b>Follow-up time (Median)</b>        | 0           | 7           | 10          | 13          | 13          | 0          | 7           | 10          | 13          | 16          | 0                 | 7          | 10         | 13         | 16         |
| <b>Age (Years)</b>                    | 39.7 (5.7)  | 40.1 (5.5)  | 40.4 (5.5)  | 40.6 (5.7)  | 40.5 (5.9)  | 59.1 (5.5) | 59.5 (5.7)  | 59.4 (5.7)  | 59.5 (5.7)  | 59.4 (5.6)  | 74.4 (3.2)        | 75.1 (3.8) | 75.3 (3.9) | 76.4 (4.5) | 77 (4.9)   |
| <b>Never smokers</b>                  | 3103        | 3099        | 3425        | 3711        | 3761        | 1963       | 2169        | 2372        | 2648        | 2721        | 240               | 388        | 538        | 834        | 976        |
| <b>Marital status n (%)</b>           |             |             |             |             |             |            |             |             |             |             |                   |            |            |            |            |
| <b>Single/never married</b>           | 210 (5.5)   | 239 (6.3)   | 274 (6.8)   | 351 (8.1)   | 409 (9.4)   | 9 (0.4)    | 17 (0.7)    | 22 (0.8)    | 32 (1.1)    | 48 (1.5)    | -                 | 1 (0.2)    | 1 (0.2)    | 3 (0.3)    | 4 (0.4)    |
| <b>Married</b>                        | 3480 (91.3) | 3436 (90.3) | 3712 (91.7) | 3852 (89)   | 3783 (87.3) | 1975 (88)  | 2090 (85.6) | 2289 (85.3) | 2549 (85.5) | 2683 (86.5) | 191 (71.8)        | 301 (71.2) | 424 (72.2) | 609 (68.4) | 709 (67.9) |
| <b>Divorced</b>                       | 47 (1.2)    | 63 (1.7)    | 67 (1.7)    | 66 (1.5)    | 90 (2.1)    | 12 (0.5)   | 14 (0.6)    | 34 (1.3)    | 43 (1.4)    | 53 (1.7)    | 3 (1.1)           | 4 (0.9)    | 10 (1.7)   | 9 (1)      | 8 (1.1)    |
| <b>Widowed</b>                        | 75 (2)      | 63 (1.7)    | 51 (1.3)    | 55 (1.3)    | 47 (1.1)    | 249 (11.1) | 322 (13.2)  | 358 (13.3)  | 356 (11.9)  | 316 (10.2)  | 72 (27.1)         | 116 (27.4) | 154 (26.2) | 269 (30.2) | 323 (30.9) |
| <b>Education and work n (%)</b>       |             |             |             |             |             |            |             |             |             |             |                   |            |            |            |            |
| <b>Literate</b>                       | 3726 (97.7) | 3749 (98.6) | 4017 (99.2) | 4310 (99.6) | 4320 (99.7) | 1707 (76)  | 1982 (81.1) | 2300 (85.7) | 2727 (91.5) | 2949 (95.1) | 141 (53)          | 252 (59.6) | 359 (61.2) | 578 (64.9) | 767 (73.5) |
| <b>Employed</b>                       | 1873 (49.1) | 1885 (49.6) | 1933 (47.8) | 1940 (44.8) | 1858 (42.9) | 620 (27.6) | 1839 (75.3) | 1970 (73.4) | 2218 (74.4) | 2297 (74)   | 42 (15.8)         | 363 (85.8) | 502 (85.5) | 814 (91.5) | 965 (92.4) |
| <b>Anthropometrics mean (SD)</b>      |             |             |             |             |             |            |             |             |             |             |                   |            |            |            |            |
| <b>Height (cm)</b>                    | 163 (9)     | 163 (9)     | 163 (9)     | 164 (10)    | 165 (10)    | 160 (9)    | 160 (9)     | 160 (9)     | 160 (10)    | 160 (10)    | 159 (9)           | 160 (9)    | 159 (9)    | 159 (10)   | 159 (10)   |
| <b>Weight (kg)</b>                    | 72 (13)     | 74 (13)     | 75 (14)     | 76 (14)     | 77 (15)     | 71 (12)    | 73 (12)     | 73 (12)     | 74 (12)     | 75 (13)     | 66 (11)           | 68 (11)    | 68 (11)    | 69 (11)    | 69 (12)    |
| <b>BMI, kg/m<sup>2</sup></b>          | 27 (5)      | 28 (5)      | 28 (5)      | 28 (5)      | 28 (5)      | 28 (5)     | 29 (5)      | 29 (5)      | 29 (5)      | 29 (5)      | 26 (4)            | 26 (4)     | 27 (5)     | 27 (5)     | 27 (5)     |
| <b>Waist circumference (cm)</b>       | 89 (11)     | 92 (11)     | 91 (12)     | 94 (11)     | 93 (12)     | 94 (11)    | 97 (11)     | 97 (11)     | 99 (11)     | 98 (11)     | 92 (11)           | 96 (10)    | 96 (11)    | 98 (11)    | 97 (11)    |
| <b>Hip circumference (cm)</b>         | 102 (9)     | 103 (9)     | 103 (9)     | 102 (8)     | 101 (8)     | 101 (10)   | 103 (9)     | 103 (10)    | 101 (8)     | 101 (9)     | 97 (8)            | 98 (8)     | 99 (9)     | 98 (8)     | 97 (8)     |
| <b>Wrist circumference (cm)</b>       | 16.7 (1.3)  | 16.9 (1.4)  | 16.7 (1.5)  | 16.7 (1.5)  | 16.2 (1.6)  | 17.2 (1.2) | 17.3 (1.3)  | 17.1 (1.4)  | 17.1 (1.4)  | 16.7 (1.5)  | 17.2 (1.2)        | 17.5 (1.3) | 17.3 (1.3) | 17.4 (1.3) | 17 (1.5)   |
| <b>Systolic blood pressure (mmHg)</b> | 115 (15)    | 112 (14)    | 110 (14)    | 112 (14)    | 112 (14)    | 132 (22)   | 128 (20)    | 126 (20)    | 126 (20)    | 125 (19)    | 142 (22)          | 138 (23)   | 137 (22)   | 136 (23)   | 135 (22)   |
| <b>Diastolic blood pressure</b>       | 78 (10)     | 75 (10)     | 74 (10)     | 77 (10)     | 77 (10)     | 82 (12)    | 79 (11)     | 77 (11)     | 81 (11)     | 80 (10)     | 80 (13)           | 76 (12)    | 74 (11)    | 78 (12)    | 78 (12)    |
| <b>Laboratory Values mean (SD)</b>    |             |             |             |             |             |            |             |             |             |             |                   |            |            |            |            |
| <b>Fasting glucose (mg/dl)</b>        | 95 (26)     | 95 (25)     | 93 (24)     | 98 (25)     | 97 (24)     | 112 (47)   | 111 (43)    | 109 (42)    | 114 (42)    | 112 (38)    | 108 (40)          | 110 (38)   | 108 (36)   | 114 (42)   | 112 (38)   |
| <b>Total cholesterol (mg/dl)</b>      | 209 (42)    | 192 (38)    | 190 (37)    | 189 (36)    | 191 (36)    | 233 (48)   | 212 (42)    | 207 (41)    | 202 (43)    | 200 (41)    | 225 (48)          | 201 (38)   | 197 (40)   | 195 (42)   | 193 (42)   |
| <b>LDL_C (mg/dl)</b>                  | 133 (35)    | 121 (33)    | 118 (32)    | 114 (31)    | 113 (31)    | 152 (40)   | 136 (36)    | 130 (35)    | 121 (36)    | 119 (37)    | 148 (40)          | 131 (32)   | 125 (35)   | 118 (37)   | 115 (37)   |
| <b>HDL_C (mg/dl)</b>                  | 41 (11)     | 38 (10)     | 41 (10)     | 47 (11)     | 48 (12)     | 43 (11)    | 39 (10)     | 42 (10)     | 47 (11)     | 49 (12)     | 43 (10)           | 39 (10)    | 42 (10)    | 47 (11)    | 50 (12)    |
| <b>Non HDL_C (mg/dl)</b>              | 167 (42)    | 153 (38)    | 149 (37)    | 142 (37)    | 142 (37)    | 190 (47)   | 172 (41)    | 165 (40)    | 154 (41)    | 151 (41)    | 182 (47)          | 162 (37)   | 155 (39)   | 147 (41)   | 143 (41)   |
| <b>Triglycerides mg/dl</b>            | 179 (123)   | 167 (111)   | 162 (109)   | 148 (100)   | 151 (113)   | 200 (127)  | 188 (112)   | 179 (100)   | 168 (104)   | 163 (90)    | 180 (107)         | 160 (97)   | 154 (78)   | 146 (70)   | 143 (67)   |
| <b>Using drug</b>                     |             |             |             |             |             |            |             |             |             |             |                   |            |            |            |            |
| <b>Lipid</b>                          | 43 (1.1)    | 80 (2.1)    | 98 (2.4)    | 167 (3.9)   | 197 (4.5)   | 116 (5.2)  | 192 (7.9)   | 320 (11.9)  | 544 (18.2)  | 760 (24.5)  | 17 (6.4)          | 23 (5.4)   | 56 (9.5)   | 186 (20.9) | 285 (27.3) |
| <b>Hypertension</b>                   | 8 (0.2)     | 132 (3.5)   | 72 (1.8)    | 139 (3.2)   | 164 (3.8)   | 11 (0.5)   | 442 (18.1)  | 307 (11.4)  | 798 (26.8)  | 887 (28.6)  | -                 | 115 (27.2) | 80 (13.6)  | 335 (37.6) | 501 (48)   |
| <b>Diabetes</b>                       | 59 (1.5)    | 113 (3)     | 122 (3)     | 152 (3.5)   | 170 (3.9)   | 202 (9)    | 296 (12.1)  | 362 (13.5)  | 460 (15.4)  | 550 (17.7)  | 28 (10.5)         | 53 (12.5)  | 78 (13.3)  | 170 (19.1) | 219 (21)   |
