# Supplementary material for: Rationale and Design of a Genetic Study on Cardiometabolic Risk Factors: Protocol for the Tehran Cardiometabolic Genetic Study (TCGS)
Source: PubMed Central journal article supplement (PMC5344981; doi:10.2196/resprot.6050), 2017-02-23
Supplement: resprot_v6i2e28_app4.pdf [file resprot_v6i2e28_app4.pdf]

**Multimedia Appendix 3: Table 3. Phenotype frequency among adult TCGS participants**

| Descriptive                             | 19-30 yrs.       |                   |                   |                   |                   | 31-50 yrs.       |                   |                   |                   |                   |
|-----------------------------------------|------------------|-------------------|-------------------|-------------------|-------------------|------------------|-------------------|-------------------|-------------------|-------------------|
|                                         | Baseline<br>2366 | 2002-2005<br>2417 | 2006-2008<br>2580 | 2009-2011<br>2775 | 2012-2014<br>2268 | Baseline<br>3812 | 2002-2005<br>3803 | 2006-2008<br>4048 | 2009-2011<br>4327 | 2012-2014<br>4332 |
| <b>Number</b>                           |                  |                   |                   |                   |                   |                  |                   |                   |                   |                   |
| <b>Hypertension status</b>              |                  |                   |                   |                   |                   |                  |                   |                   |                   |                   |
| Normal                                  | 1514 (64)        | 1762 (72.9)       | 2008 (77.8)       | 1929 (69.5)       | 1546 (68.2)       | 1882 (49.4)      | 2239 (58.9)       | 2539 (62.7)       | 2310 (53.4)       | 2249 (51.9)       |
| hypertension                            | 83 (3.5)         | 69 (2.9)          | 54 (2.1)          | 113 (4.1)         | 93 (4.1)          | 513 (13.5)       | 349 (9.2)         | 304 (7.5)         | 593 (13.7)        | 505 (11.7)        |
| Pre-hypertension                        | 708 (29.9)       | 511 (21.1)        | 490 (19)          | 688 (24.8)        | 597 (26.3)        | 1339 (35.1)      | 1100 (28.9)       | 1161 (28.7)       | 1373 (31.7)       | 1541 (35.6)       |
| <b>Dyslipidemia status</b>              |                  |                   |                   |                   |                   |                  |                   |                   |                   |                   |
| Normal                                  | 816 (34.5)       | 597 (24.7)        | 808 (31.3)        | 928 (33.4)        | 698 (30.8)        | 519 (13.6)       | 446 (11.7)        | 589 (14.6)        | 732 (16.9)        | 780 (18)          |
| Dyslipidemia                            | 310 (13.1)       | 217 (9)           | 211 (8.2)         | 175 (6.3)         | 172 (7.6)         | 1119 (29.4)      | 843 (22.2)        | 809 (20)          | 760 (17.6)        | 744 (17.2)        |
| Pre-dyslipidemia                        | 1149 (48.6)      | 999 (41.3)        | 1093 (42.4)       | 1159 (41.8)       | 1021 (45)         | 2069 (54.3)      | 2070 (54.4)       | 2246 (55.5)       | 2286 (52.8)       | 2249 (51.9)       |
| <b>Diabetes status</b>                  |                  |                   |                   |                   |                   |                  |                   |                   |                   |                   |
| Normal                                  | 2093 (88.5)      | 2168 (89.7)       | 2434 (94.3)       | 2477 (89.3)       | 1974 (87)         | 2655 (69.6)      | 2688 (70.7)       | 3157 (78)         | 3045 (70.4)       | 3033 (70)         |
| Diabetic                                | 14 (0.6)         | 17 (0.7)          | 16 (0.6)          | 32 (1.2)          | 32 (1.4)          | 277 (7.3)        | 281 (7.4)         | 279 (6.9)         | 289 (6.7)         | 310 (7.2)         |
| Pre-diabetic                            | 145 (6.1)        | 122 (5)           | 88 (3.4)          | 213 (7.7)         | 224 (9.9)         | 738 (19.4)       | 681 (17.9)        | 560 (13.8)        | 944 (21.8)        | 955 (22)          |
| <b>Obesity status</b>                   |                  |                   |                   |                   |                   |                  |                   |                   |                   |                   |
| Underweight                             | 437 (18.5)       | 345 (14.3)        | 397 (15.4)        | 341 (12.3)        | 255 (11.2)        | 137 (3.6)        | 91 (2.4)          | 87 (2.1)          | 78 (1.8)          | 83 (1.9)          |
| Normal                                  | 997 (42.1)       | 947 (39.2)        | 1121 (43.4)       | 1142 (41.2)       | 903 (39.8)        | 990 (26)         | 841 (22.1)        | 920 (22.7)        | 945 (21.8)        | 987 (22.8)        |
| Obese                                   | 626 (26.5)       | 636 (26.3)        | 702 (27.2)        | 827 (29.8)        | 709 (31.3)        | 1654 (43.4)      | 1569 (41.3)       | 1853 (45.8)       | 1972 (45.6)       | 1882 (43.4)       |
| Morbid obese                            | 233 (9.8)        | 259 (10.7)        | 286 (11.1)        | 383 (13.8)        | 317 (14)          | 950 (24.9)       | 1036 (27.2)       | 1134 (28)         | 1251 (28.9)       | 1258 (29)         |
| <b>Metabolic syndrome status (Mets)</b> |                  |                   |                   |                   |                   |                  |                   |                   |                   |                   |
| Normal                                  | 1984 (83.9)      | 1971 (81.5)       | 2280 (88.4)       | 2472 (89.1)       | 2005 (88.4)       | 2475 (64.9)      | 2369 (62.3)       | 2862 (70.7)       | 3168 (73.2)       | 3246 (74.9)       |
| Mets with 3 risk factor                 | 173 (7.3)        | 136 (5.6)         | 142 (5.5)         | 155 (5.6)         | 124 (5.5)         | 738 (19.4)       | 772 (20.3)        | 763 (18.8)        | 715 (16.5)        | 644 (14.9)        |
| Mets with 4 risk factor                 | 26 (1.1)         | 34 (1.4)          | 18 (0.7)          | 44 (1.6)          | 34 (1.5)          | 329 (8.6)        | 284 (7.5)         | 239 (5.9)         | 299 (6.9)         | 249 (5.7)         |
| Mets with 5 risk factor                 | 5 (0.2)          | 4 (0.2)           | 1 (0)             | #VALUE!           | 4 (0.2)           | 62 (1.6)         | 62 (1.6)          | 45 (1.1)          | 52 (1.2)          | 64 (1.5)          |
| <b>Number</b>                           | 2245             | 2443              | 2684              | 2981              | 3102              | 266              | 423               | 587               | 890               | 1044              |
| <b>Hypertension status</b>              |                  |                   |                   |                   |                   |                  |                   |                   |                   |                   |
| Normal                                  | 509 (22.7)       | 652 (26.7)        | 795 (29.6)        | 753 (25.3)        | 757 (24.4)        | 39 (14.7)        | 69 (16.3)         | 101 (17.2)        | 134 (15.1)        | 122 (11.7)        |
| hypertension                            | 845 (37.6)       | 757 (31)          | 758 (28.2)        | 1029 (34.5)       | 997 (32.1)        | 137 (51.5)       | 200 (47.3)        | 257 (43.8)        | 433 (48.7)        | 528 (50.6)        |
| Pre-hypertension                        | 848 (37.8)       | 990 (40.5)        | 1073 (40)         | 1174 (39.4)       | 1320 (42.6)       | 87 (32.7)        | 145 (34.3)        | 216 (36.8)        | 313 (35.2)        | 386 (37)          |
| <b>Dyslipidemia status</b>              |                  |                   |                   |                   |                   |                  |                   |                   |                   |                   |
| Normal                                  | 128 (5.7)        | 144 (5.9)         | 172 (6.4)         | 227 (7.6)         | 231 (7.4)         | 16 (6)           | 25 (5.9)          | 49 (8.3)          | 49 (5.5)          | 74 (7.1)          |
| Dyslipidemia                            | 1127 (50.2)      | 1079 (44.2)       | 1149 (42.8)       | 1291 (43.3)       | 1443 (46.5)       | 123 (46.2)       | 157 (37.1)        | 232 (39.5)        | 421 (47.3)        | 517 (49.5)        |
| Pre-dyslipidemia                        | 954 (42.5)       | 1092 (44.7)       | 1259 (46.9)       | 1298 (43.5)       | 1266 (40.8)       | 118 (44.4)       | 219 (51.8)        | 274 (46.7)        | 372 (41.8)        | 402 (38.5)        |
| <b>Diabetes status</b>                  |                  |                   |                   |                   |                   |                  |                   |                   |                   |                   |
| Normal                                  | 1045 (46.5)      | 1159 (47.4)       | 1384 (51.6)       | 1270 (42.6)       | 1276 (41.1)       | 119 (44.7)       | 172 (40.7)        | 264 (45)          | 310 (34.8)        | 356 (34.1)        |
| Diabetic                                | 526 (23.4)       | 568 (23.3)        | 605 (22.5)        | 773 (25.9)        | 792 (25.5)        | 66 (24.8)        | 107 (25.3)        | 145 (24.7)        | 268 (30.1)        | 342 (32.8)        |
| Pre-diabetic                            | 617 (27.5)       | 663 (27.1)        | 660 (24.6)        | 919 (30.8)        | 1013 (32.7)       | 71 (26.7)        | 138 (32.6)        | 171 (29.1)        | 300 (33.7)        | 342 (32.8)        |
| <b>Obesity status</b>                   |                  |                   |                   |                   |                   |                  |                   |                   |                   |                   |
| Underweight                             | 55 (2.4)         | 47 (1.9)          | 37 (1.4)          | 48 (1.6)          | 46 (1.5)          | 9 (3.4)          | 16 (3.8)          | 28 (4.8)          | 26 (2.9)          | 32 (3.1)          |
| Normal                                  | 519 (23.1)       | 449 (18.4)        | 476 (17.7)        | 454 (15.2)        | 496 (16)          | 85 (32)          | 135 (31.9)        | 156 (26.6)        | 203 (22.8)        | 251 (24)          |
| Obese                                   | 971 (43.3)       | 1042 (42.7)       | 1182 (44)         | 1238 (41.5)       | 1266 (40.8)       | 121 (45.5)       | 180 (42.6)        | 260 (44.3)        | 339 (38.1)        | 362 (34.7)        |
| Morbid obese                            | 667 (29.7)       | 798 (32.7)        | 949 (35.4)        | 1166 (39.1)       | 1224 (39.5)       | 40 (15)          | 73 (17.3)         | 126 (21.5)        | 190 (21.3)        | 232 (22.2)        |
| <b>Metabolic syndrome status (Mets)</b> |                  |                   |                   |                   |                   |                  |                   |                   |                   |                   |
| Normal                                  | 1023 (45.6)      | 1016 (41.6)       | 1281 (47.7)       | 1535 (51.5)       | 1714 (55.3)       | 135 (50.8)       | 196 (46.3)        | 300 (51.1)        | 433 (48.7)        | 535 (51.2)        |
| Mets with 3 risk factor                 | 530 (23.6)       | 656 (26.9)        | 685 (25.5)        | 687 (23)          | 717 (23.1)        | 49 (18.4)        | 99 (23.4)         | 128 (21.8)        | 182 (20.4)        | 195 (18.7)        |
| Mets with 4 risk factor                 | 440 (19.6)       | 471 (19.3)        | 454 (16.9)        | 514 (17.2)        | 460 (14.8)        | 56 (21.1)        | 73 (17.3)         | 92 (15.7)         | 101 (11.3)        | 107 (10.2)        |
| Mets with 5 risk factor                 | 161 (7.2)        | 170 (7)           | 175 (6.5)         | 160 (5.4)         | 128 (4.1)         | 12 (4.5)         | 33 (7.8)          | 36 (6.1)          | 38 (4.3)          | 39 (3.7)          |
